RESEARCH ARTICLE

# Cloning and Characterization of Novel Testis-Specific Diacylglycerol Kinase $\eta$ Splice Variants 3 and 4

Eri Murakami, Takao Shionoya, Suguru Komenoi, Yuji Suzuki, Fumio Sakane\*

Department of Chemistry, Graduate School of Science, Chiba University, Chiba, Japan

\* [sakane@faculty.chiba-u.jp](mailto:sakane@faculty.chiba-u.jp)

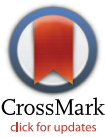

**OPEN ACCESS**

**Citation:** Murakami E, Shionoya T, Komenoi S, Suzuki Y, Sakane F (2016) Cloning and Characterization of Novel Testis-Specific Diacylglycerol Kinase  $\eta$  Splice Variants 3 and 4. PLoS ONE 11(9): e0162997. doi:10.1371/journal.pone.0162997

**Editor:** Barbara Bardoni, Centre National de la Recherche Scientifique, FRANCE

**Received:** June 23, 2016

**Accepted:** August 31, 2016

**Published:** September 19, 2016

**Copyright:** © 2016 Murakami et al. This is an open access article distributed under the terms of the [Creative Commons Attribution License](https://creativecommons.org/licenses/by/4.0/), which permits unrestricted use, distribution, and reproduction in any medium, provided the original author and source are credited.

**Data Availability Statement:** All relevant data are within the paper.

**Funding:** This work was supported by MEXT/JSPS KAKENHI Grant Numbers 22370047 (Grant-in-Aid for Scientific Research (B)), 23116505 (Grant-in-Aid for Scientific Research on Innovative Areas), 25116704 (Grant-in-Aid for Scientific Research on Innovative Areas), 26291017 (Grant-in-Aid for Scientific Research (B)) and 15K14470 (Grant-in-Aid for Challenging Exploratory Research), the Japan Science and Technology Agency (AS221Z00794F, AS231Z00139G, AS251Z01788Q and

## Abstract

Diacylglycerol kinase (DGK) phosphorylates DG to generate phosphatidic acid. Recently, we found that a new alternative splicing product of the DGK $\eta$  gene, DGK $\eta$ 3, which lacks exon 26 encoding 31 amino acid residues, was expressed only in the secondary spermatozoa and round spermatids of the testis. In this study, we cloned the full length DGK $\eta$ 3 gene and confirmed the endogenous expression of its protein product. During the cloning procedure, we found a new testis-specific alternative splicing product of the DGK $\eta$  gene, DGK $\eta$ 4, which lacks half of the catalytic domain. We examined the DGK activity and subcellular localization of DGK $\eta$ 3 and  $\eta$ 4. DGK $\eta$ 3 had almost the same activity as DGK $\eta$ 1, whereas the activity of DGK $\eta$ 4 was not detectable. In resting NEC8 cells (human testicular germ cell tumor cell line), DGK $\eta$ 1,  $\eta$ 3 and  $\eta$ 4 were broadly distributed in the cytoplasm. When osmotically shocked, DGK $\eta$ 1 and  $\eta$ 4 were distributed in punctate vesicles in the cytoplasm. In contrast, DGK $\eta$ 3 was partly translocated to the plasma membrane and co-localized with the actin cytoskeleton. These results suggest that DGK $\eta$ 3 and  $\eta$ 4 have properties different from those of DGK $\eta$ 1 and that they play roles in the testis in a different manner.

## Introduction

Diacylglycerol kinase (DGK) phosphorylates diacylglycerol to generate phosphatidic acid [1–6]. Diacylglycerol, which is liberated from phosphatidylinositol 4,5-bisphosphate and phosphatidylcholine upon cell stimulation, regulates a wide range of cellular functions. It is well known that DGK represents a large enzyme family. Ten mammalian DGK isozymes, namely  $\alpha$ ,  $\beta$ ,  $\gamma$ ,  $\delta$ ,  $\epsilon$ ,  $\zeta$ ,  $\eta$ ,  $\theta$ ,  $\iota$  and  $\kappa$ , which contain two or three characteristic cysteine-rich C1 domains and the catalytic region in common, are subdivided into five subgroups according to their structural features [1–6]. The type II DGK [7] comprises the  $\delta$  [8],  $\eta$  [9] and  $\kappa$  [10] isozymes. The occurrence of alternative splicing was reported for DGK $\delta$  ( $\delta$ 1 and  $\delta$ 2) [11] and DGK $\eta$  ( $\eta$ 1 and  $\eta$ 2 (Fig 1)) [12]. All of the type II DGK isoforms possess a pleckstrin homology domain at their N termini and a separated catalytic domain, and DGKs  $\delta$ 1,  $\delta$ 2 and  $\eta$ 2 but not DGKs  $\eta$ 1 or  $\kappa$  contain a sterile  $\alpha$ -motif (SAM) domain at their C termini. The pleckstrin homology domain of DGK $\eta$  was found to preferentially interact with phosphatidylinositol-4,5-bisphosphate [13].

AS2621643Q), the Naito Foundation, the Hamaguchi Foundation for the Advancement of Biochemistry, the Daiichi-Sankyo Foundation of Life Science, the Terumo Life Science Foundation, the Futaba Electronic Memorial Foundation, the Daiwa Securities Health Foundation, the Ono Medical Research Foundation, the Japan Foundation for Applied Enzymology, the Food Science Institute Foundation, the Skylark Food Science Institute and the Venture Business Laboratory of Chiba University (FS). The funders had no role in study design, data collection and analysis, decision to publish, or preparation of the manuscript.

**Competing Interests:** The authors have declared that no competing interests exist.

**Abbreviations:** DGK, diacylglycerol kinase; KO, knockout.

Moreover, it has been reported that DGKs  $\delta$ 1,  $\delta$ 2 and  $\eta$ 2 formed oligomers through interactions among their SAM domains and that this oligomer formation regulates the subcellular localizations of these DGK isoforms [11, 12, 14–16]. Interestingly, DGK $\eta$  is a unique enzyme with high affinity for DG [17].

We recently reported that DGK $\eta$  is expressed in stomach cancer and HeLa cervical cancer cells and that it is required for the Ras/B-Raf/C-Raf/MEK/ERK signaling cascade, which is activated by epidermal growth factor [18]. Moreover, DGK $\eta$  was reported to be involved in lung cancer [19]. DGK $\eta$  is known to be most abundantly expressed in the brain [9, 20]. Recent genome-wide association studies implicated the DGK $\eta$  gene in the etiology of bipolar disorder [21–23]. Intriguingly, deficiency of DGK $\eta$  indeed induced lithium-sensitive bipolar disorder (mania)-like behavior [24].

Several reports have revealed that DGK $\eta$  is abundantly expressed in the reproductive organs, testis and ovary [8–12]. Therefore, we examined the expression and spatial distribution of the DGK $\eta$ 1 and  $\eta$ 2 proteins and mRNAs in the mouse reproductive organs [25]. The results indicate distinct expression patterns, which were obviously different from each other. DGK $\eta$ 1 was distributed in the oviductal epithelium of the ovary and in the luminal epithelium of the uterus. However, DGK $\eta$ 2 was not detectable in reproductive organs. Moreover, we found a new splice variant of DGK $\eta$ , DGK $\eta$ 3, which was specifically expressed in the testis. Furthermore, DGK $\eta$ 3 was strongly expressed in the secondary spermatocytes and round spermatids of the testis, suggesting that this isoform plays specialized roles in spermatogenesis.

In this study, we cloned the full length DGK $\eta$ 3 gene. Moreover, during the cloning procedure, we found a new testis-specific alternative splicing product of DGK $\eta$  gene, DGK $\eta$ 4, which lacks the C-terminal half of DGK $\eta$ 3 and then examined the properties of DGK $\eta$ 3 and  $\eta$ 4.

## Experimental Procedures

### Cell culture, transfection and osmotic shock

COS-7 cells were maintained in Dulbecco's modified Eagle's medium (Wako Pure Chemicals, Osaka, Japan) containing 10% fetal bovine serum (Corning, Corning, NY) at 37°C in an atmosphere of 5% CO<sub>2</sub>. cDNA was transfected into COS-7 cells by electroporation with a Gene Pulser Xcell<sup>TM</sup> Electroporation System (Bio-Rad Laboratories, Tokyo, Japan) according to the manufacturer's instructions.

NEC8 (a human embryonal carcinoma cells derived from testis) were obtained from Japanese Collection of Research Bioresources (Tokyo, Japan). The cells were maintained in RPMI-1640 medium (Wako Pure Chemicals) containing 10% fetal bovine serum at 37°C in an atmosphere of 5% CO<sub>2</sub>. The cells were transiently transfected with cDNA using FuGENE HD Transfection Reagent (Promega, Tokyo, Japan) according to the manufacturer's instructions. Twenty-four hours after transfection, the cells were serum starved for 3 h and incubated in RPMI-1640 with 500 mM sorbitol for 30 min.

### Plasmid constructs

cDNAs encoding for mouse DGK $\eta$ 1 (1–1156 aa), DGK $\eta$ 3 (1–1125 aa) and DGK $\eta$ 4 (1–558 aa) were amplified by PCR using KOD-plus DNA polymerase (Toyobo, Osaka, Japan). The products were inserted into the Sall/SacII site of pAcGFP-C1 vector (Clontech-Takara Bio, Kusatsu, Japan).

### Western blot analysis

The testes from 10-week-old male mice were homogenized in lysis buffer (50 mM HEPES, pH7.2, 150 mM NaCl, and 5 mM MgCl<sub>2</sub>) containing 1 mM phenylmethylsulfonyl fluoride,

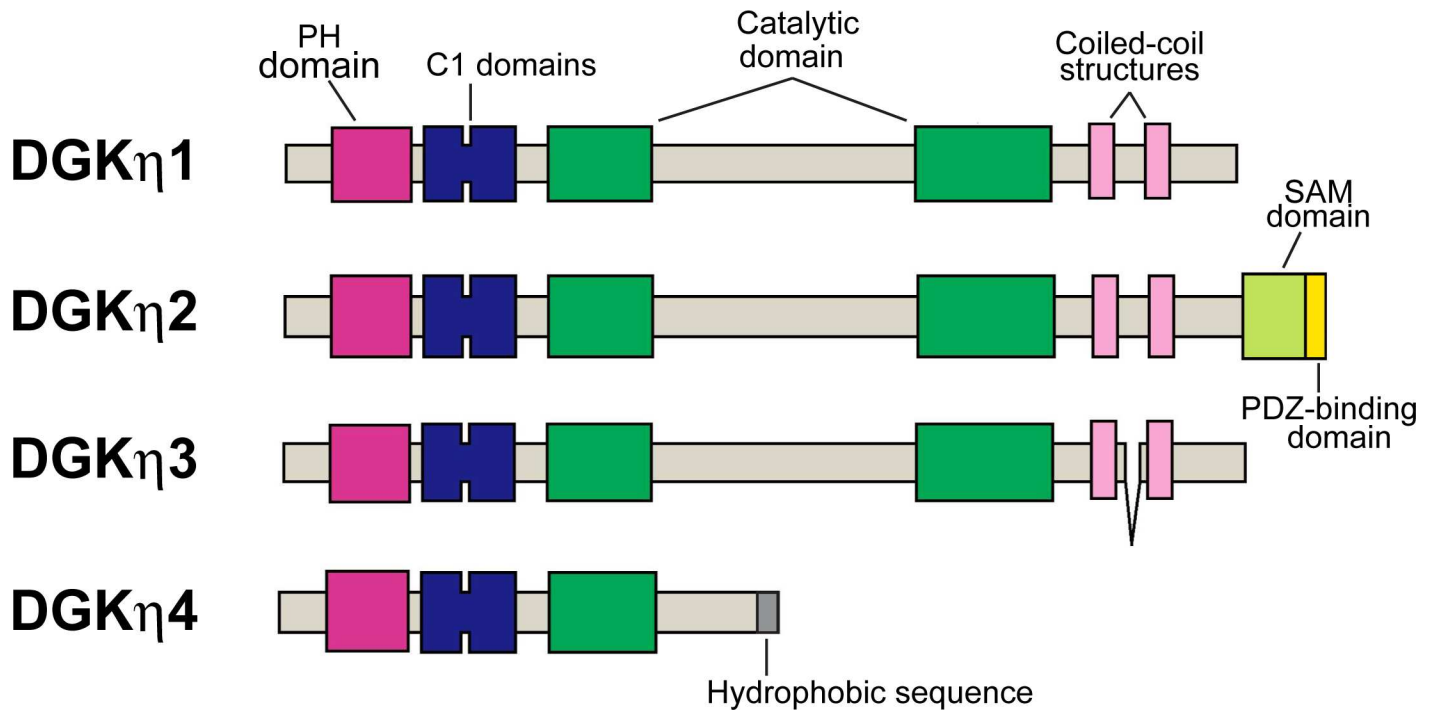

**Fig 1. Schematic representation of the domain architectures of DGK $\eta$ 1, DGK $\eta$ 2, DGK $\eta$ 3 and DGK $\eta$ 4.** DGK $\eta$ 3 and DGK $\eta$ 4 are new alternative splice variants.

doi:10.1371/journal.pone.0162997.g001

20  $\mu$ g/ml each of leupeptin, pepstatin, aprotinin and soybean trypsin inhibitor and Complete EDTA-free Protease Inhibitor Cocktail (Roche Diagnostics), and centrifuged at 1,000 x g for 5 min. The protein concentration in the supernatants was determined using a bicinchoninic acid protein assay kit (Thermo Scientific, Hudson, NH, USA). The tissue lysates (50  $\mu$ g of protein) were separated on SDS-PAGE, and the separated proteins were transferred to a polyvinylidene difluoride membrane (Pall Life Sciences, Port Washington, NY, USA). The membrane was blocked with 5% skim milk and incubated with an anti-DGK $\eta$  polyclonal antibody [24] overnight at 4°C. The immunoreactive bands were visualized using a peroxidase-conjugated anti-rabbit IgG antibody (Jackson ImmunoResearch Laboratories, West Grove, PA, USA) and the ECL Western Blotting Detection System (GE Healthcare Bio-Sciences, Piscataway, NJ, USA).

COS-7 cell lysates were separated on SDS-PAGE. The separated proteins were transferred to polyvinylidene difluoride membrane and blocked with 5% skim milk. The membrane was incubated with anti-GFP antibody (sc-9996, Santa Cruz Biotech, Santa Cruz, CA) for 1 h. The immunoreactive bands were visualized using peroxidase-conjugated anti-mouse IgG antibody and the Enhanced Chemiluminescence Western Blotting Detection System.

### Reverse transcription (RT)-PCR

Total RNA was isolated from each tissue of the 10 to 12-week-old male and female mice using a Direct-zol RNA MiniPrep kit (Zymo Research, Irvine, CA). cDNA synthesis was performed with the Transcription First-Strand cDNA Synthesis kit (Roche Diagnostics, Mannheim, Germany). PCR amplification was performed using rTaq polymerase (Toyobo) and the following mouse-DGK $\eta$  specific primers: primer A (nucleotide positions 2416–2436, 5'-GGGAATCCCGGAGCTACTACAGAGATC-3') and primer B (nucleotide positions 3451–3471, 5'-CTTCCTCTGTGCCCAATTCTG-3'). The PCR conditions for these two primers were as follows:

94°C for 3 min, 35 cycles of 94°C for 30 sec, 55°C for 30 sec, and 72°C for 2 min, and 72°C for 5 min. PCR was also performed with primer C (nucleotide positions 1411–1422, 5'- CCTGAA CCTGTGGCAGCAACTG-3') and primer D (nucleotide positions 1681–1702, 5'- GGACTC GACTGGCCTGAGAGTC-3'). The PCR conditions used for these primers were as follows: 94°C for 3 min, 35 cycles of 94°C for 30 sec, 48°C for 30 sec, 72°C for 1 min 30 sec and 72°C for 5 min.

### Confocal laser scanning microscopy

NEC8 cells grown on poly-L-lysine (Sigma-Aldrich, St. Louis, MO)-coated glass coverslips were transfected with pAcGFP-DGK $\eta$ 1,  $\eta$ 3,  $\eta$ 4 or pAcGFP vector alone. After 24 h, the cells were serum starved for 3 h and then incubated in 500 mM sorbitol for 30 min. The cells were then fixed in 3.7% formaldehyde. The filamentous actin (F-actin) was stained with Alexa 594-conjugated phalloidin (Thermo Fisher Scientific, Waltham, MA), and the nuclei were stained with 4',6-diamino-2-phenylindole (DAPI). The coverslips were mounted using Vecta-shield (Vector Laboratories, Peterborough, UK). The cells were examined using inverted confocal laser microscopy (FV1000-D, Olympus, Tokyo, Japan).

### DGK activity assay

pAcGFP-DGK $\eta$ 1,  $\eta$ 3,  $\eta$ 4 or pAcGFP vector were transfected into COS-7 cells. After 48 h, the cells were harvested and suspended in ice-cold lysis buffer (50 mM HEPES (pH 7.2), 150 mM NaCl, 5 mM MgCl<sub>2</sub>, 1 mM dithiothreitol, complete™ EDTA-free protease inhibitor (Roche Diagnostics)) and were then sonicated. The octylglucoside mixed micellar assay of DGK activity was performed as described previously [8]. In brief, the assay mixture (50  $\mu$ L) contained 50 mM MOPS (pH 7.2), 50 mM n-octyl- $\beta$ -D-glucoside, 1 mM dithiothreitol, 20 mM NaF, 10 mM MgCl<sub>2</sub>, 1  $\mu$ M CaCl<sub>2</sub>, 27 mol% PS, 5.0 mol% 1,2-dioleoyl-sn-glycerol (18:1/18:1-diacylglycerol) and 1 mM [ $\gamma$ -<sup>32</sup>P]ATP (100000 cpm/nmol). The reaction was initiated by adding the cell lysates, and it continued for 5 min at 30°C. Lipids were extracted from the mixture, and phosphatidic acid was separated by thin layer chromatography. The phosphatidic acid spot was scraped and counted by a liquid scintillation spectrophotometer.

### Statistical analysis

Statistical comparisons were performed using one-way ANOVA followed by a Tukey's test.

## Results

### Cloning of full length DGK $\eta$ 3

We previously found a new alternative splicing product of DGK $\eta$  gene, DGK $\eta$ 3, which lacks exon 26 encoding 31 amino acid residues [25] (Fig 1). However, it is still unknown whether the DGK $\eta$ 3 mRNA is a derivative of the DGK $\eta$ 1 mRNA or the DGK $\eta$ 2 mRNA. To clarify this, it is needed to determine whether DGK $\eta$ 3 gene contains exon 29, which produces DGK $\eta$ 2 (Figs 1 and 2A), or not. Thus, we performed RT-PCR using primer A (in exon 20) and B (in exon 30) indicated in Fig 2A. If DGK $\eta$ 3 contains exon 29, a 1094 bp product will be amplified (Fig 2A). If not, a 963 bp band will be detected (Fig 2A). As shown in Fig 2B, only the 963 bp product was amplified, indicating that the DGK $\eta$ 3 mRNA does not contain exon 29 and is derived from the DGK $\eta$ 1 mRNA. We next cloned and completely sequenced the full-length DGK $\eta$ 3 mRNA, and consequently confirmed that the DGK $\eta$ 3 mRNA is a derivative of the DGK $\eta$ 1 mRNA (Fig 1). Therefore, the protein product of DGK $\eta$ 3 does not contain a SAM domain (Fig 1).

**A**

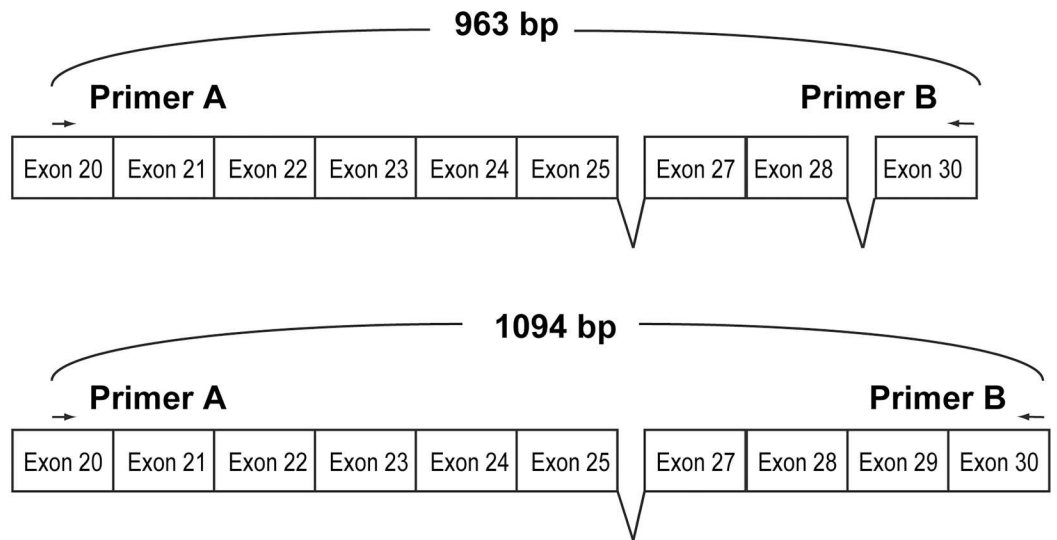

**B**

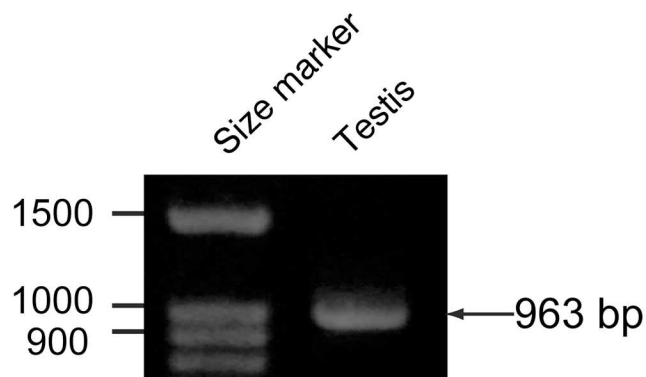

**C**

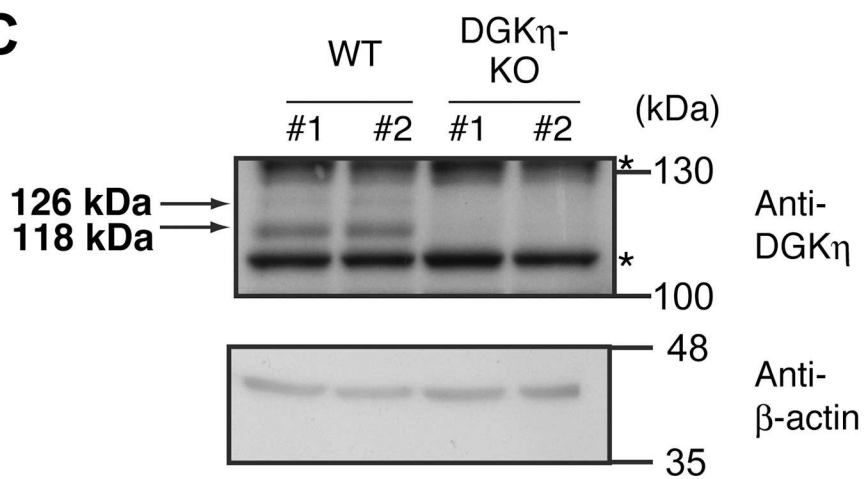

**Fig 2. DGK $\eta$ 3 is derived from DGK $\eta$ 1.** (A) Schematic representation of the primers used for RT-PCR. (B) RT-PCR analysis was carried out on mRNA prepared from mouse testis using primers A and B. Representatives of three independent experiments are shown. (C) The protein samples (50  $\mu$ g) from the testes of 10-week-old wild-type (WT) and DGK $\eta$ -knockout (KO) male mice were analyzed by Western blotting using anti-DGK $\eta$  and  $\beta$ -actin antibodies. \*: non-specific band.

doi:10.1371/journal.pone.0162997.g002

Although the DGK $\eta$ 3 mRNA was strongly expressed in the testis, its protein band has not been detected in our previous report [25]. It is possible that the DGK $\eta$ 3 protein is unstable and quickly degraded. Therefore, in the present study, we added various protease inhibitors (see [Experimental Procedures](#)) into testis samples to prevent proteolysis, and performed Western blotting. As shown in [Fig 2C](#), we robustly detected anti-DGK $\eta$  antibody-reactive bands of 126 kDa, which approximately correspond to a calculated molecular mass of 124 kDa of DGK $\eta$ 3, and 118 kDa. Moreover, we confirmed that the 126 and 118 kDa bands were disappeared in testes of DGK $\eta$ -knockout mice [24]. These results strongly suggest that the DGK $\eta$ 3 mRNA is translated in the testis. The lower band (118 kDa) may be a product of proteolytic degradation from the upper band (126 kDa).

## Identification of DGK $\eta$ 4

When we performed RT-PCR for sequencing, we detected a longer DGK $\eta$  mRNA (327 bp) that includes 35 bp of additional nucleotides derived from intron 14 ([Fig 3A and 3B](#)). This insertion leads to a frame shift, resulting in an in-frame stop codon in exon 15 and generating the extra 15 aa hydrophobic tail, IFPSFMSFLMSAQS ([Fig 3A and 3C](#)). Therefore, we designated it DGK $\eta$ 4 as a new splice variant of the DGK $\eta$  gene ([Fig 1](#)). RT-PCR using primers C in exon 12 and primer D in exon 15 ([Fig 3A and 3B](#)) showed that the product derived from DGK $\eta$ 4 was approximately 46% and that derived from DGK $\eta$ 3 was approximately 54% ([Fig 3B](#)). The encoding protein of the DGK $\eta$ 4 gene stops at the middle of the intermediate region between separated catalytic subdomains ([Fig 1](#)). Therefore, the DGK $\eta$ 4 protein lacks the C-terminal half of the catalytic domain.

## Expression of DGK $\eta$ 3 and DGK $\eta$ 4 mRNAs

In addition to the testis, expression of DGK $\eta$ 3 and  $\eta$ 4 mRNAs in other organs such as brain, liver, kidney, lung, skeletal muscle, vesicula seminalis, prostate gland, epididymis, ovary and uterus were analyzed using primers A and B, which amplify 828 bp (DGK $\eta$ 1 and  $\eta$ 2) and 735 bp (DGK $\eta$ 3) products, respectively, and were analyzed using primers C and D, which amplify 327 bp (DGK $\eta$ 1,  $\eta$ 2 and  $\eta$ 3) and 292 bp (DGK $\eta$ 4) products, respectively. Shionoya *et al.* reported that DGK $\eta$ 3 was not expressed in ovary or uterus whereas DGK $\eta$ 1 and  $\eta$ 2 were expressed there. Thus, the expression of DGK $\eta$ 3 in brain, liver, kidney, lung, skeletal muscle, vesicula seminalis, prostate gland and epididymis was checked. We confirmed that the 735 bp band derived from DGK $\eta$ 3 mRNA was expressed in testis alone ([Fig 4](#)). On the other hand, the 828 bp product (DGK $\eta$ 1 and  $\eta$ 2) was detected in brain, liver, kidney, lung, skeletal muscle, vesicula seminalis, prostate gland and epididymis.

The 327 bp product amplified from DGK $\eta$ 4 mRNA was also detected only in the testis ([Fig 4](#)). The 292 bp product (DGK $\eta$ 1,  $\eta$ 2 and  $\eta$ 3) was detected in testis, brain, liver, kidney, lung, skeletal muscle, prostate gland, ovary and uterus. In vesicula seminalis, epididymis, liver and skeletal muscle, other products having different lengths were detected, suggesting that other alternative splicing variants of the DGK $\eta$  gene may exist. These results strongly suggest that DGK $\eta$ 3 and  $\eta$ 4 mRNAs are testis-specifically expressed.

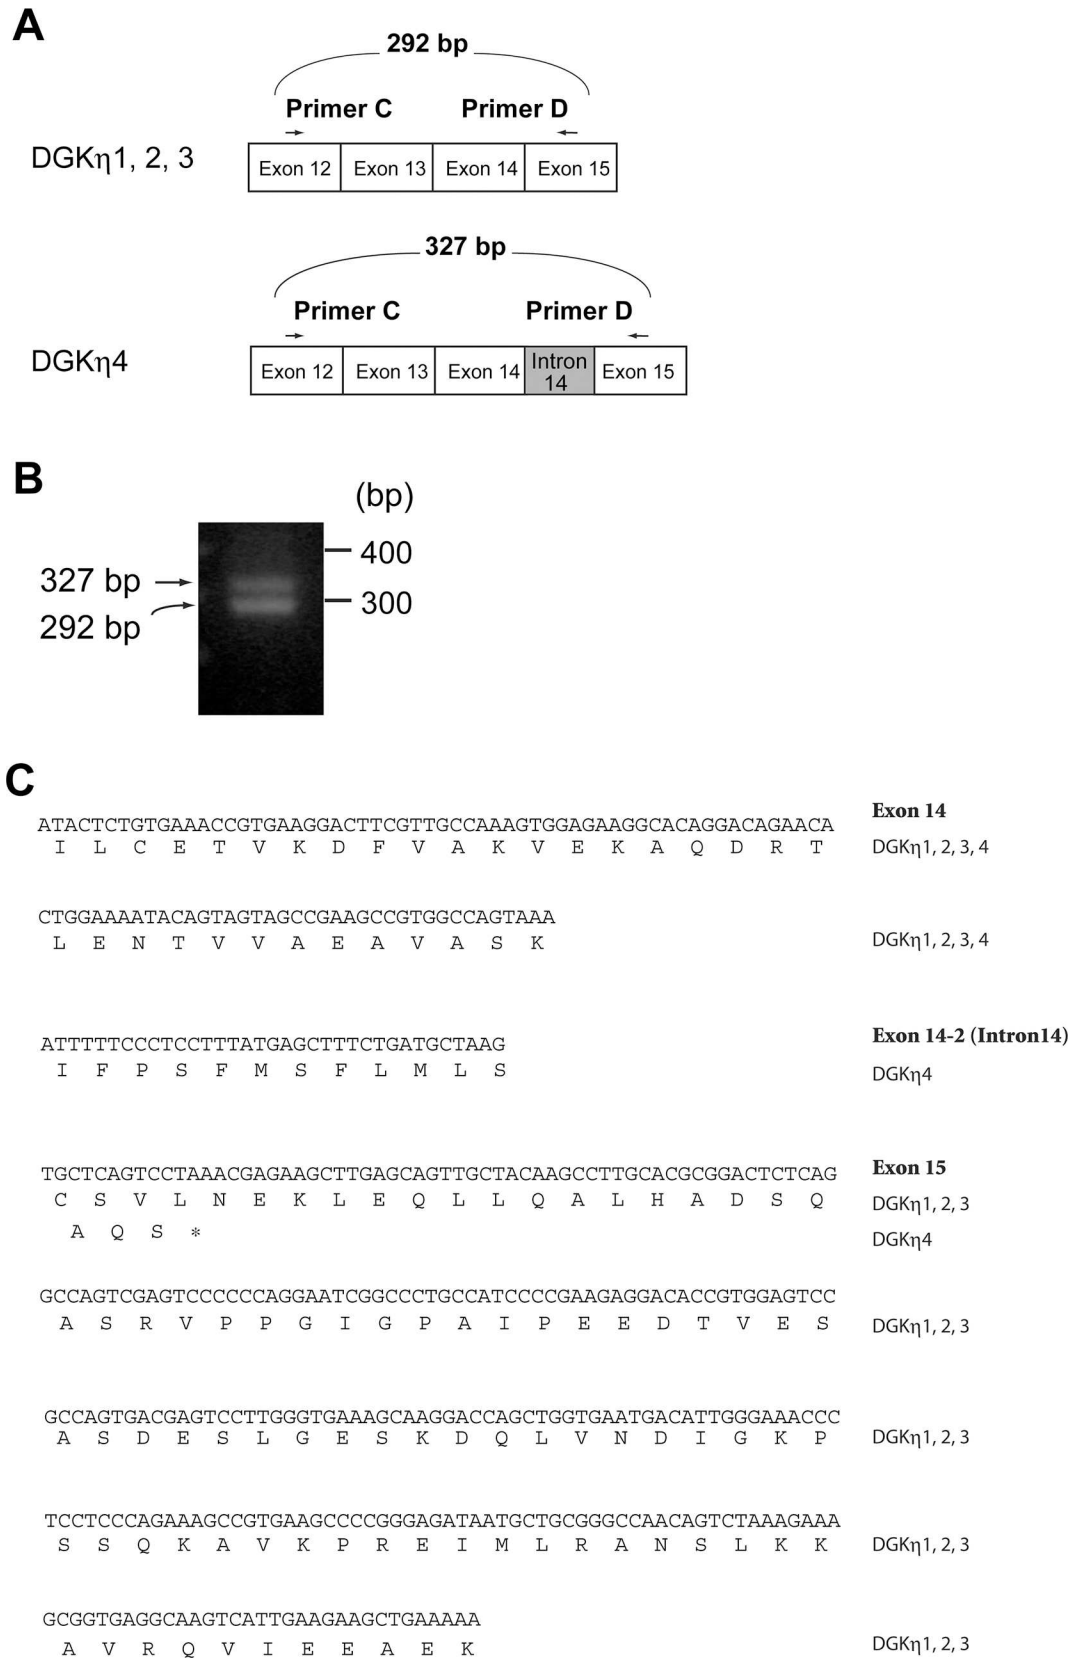

**Fig 3. A new alternative splicing variant, DGK $\eta$ 4.** (A) Schematic representation of the primers used for RT-PCR. (B) The nucleotide sequences and deduced amino acid sequences of DGK $\eta$ 1, DGK $\eta$ 2, DGK $\eta$ 3 and DGK $\eta$ 4 are shown. (C) RT-PCR analysis was carried out on mRNA prepared from mouse testis using primers C and D. Representatives of three independent experiments are shown.

doi:10.1371/journal.pone.0162997.g003

### DGK activities of DGK $\eta$ 3 and $\eta$ 4

We next characterized properties of the newly identified splice variants, DGK $\eta$ 3 and  $\eta$ 4. To measure DGK activities of protein products encoded by DGK $\eta$ 3 and  $\eta$ 4 genes, these proteins were overexpressed in COS-7 cells. We confirmed expression of DGK $\eta$ 3,  $\eta$ 4 and  $\eta$ 1, which is a positive control (Fig 5A). Compared to DGK activity of DGK $\eta$ 1, DGK $\eta$ 3 exhibited almost the same (approximately 80%) activity (Fig 5B), indicating that DGK $\eta$ 3 is catalytically active. On the other hand, DGK activity of DGK $\eta$ 4 was not detectable (Fig 5B), indicating that this isoform is kinase negative.

### Subcellular localization of DGK $\eta$ 3 and $\eta$ 4 in NEC8 cells

We next tested whether DGK $\eta$ 3 and  $\eta$ 4 respond to stress stimulation. To address this, we determined subcellular localization of DGK $\eta$ 3 and  $\eta$ 4 in NEC8 cells (human testicular germ cell tumor cell line) in the presence and absence of 0.5 M sorbitol (osmotic stress). AcGFP alone were broadly distributed in the cytoplasm and nucleus in the presence and absence of 0.5 M sorbitol (Fig 6A and 6B). In the absence of sorbitol, DGK $\eta$ 1,  $\eta$ 3 and  $\eta$ 4 were broadly distributed in the cytoplasm, and localization of either DGK $\eta$ 1,  $\eta$ 3 or  $\eta$ 4 at the plasma membrane was not detectable (Fig 6A). When osmotically shocked, DGK $\eta$ 1 and  $\eta$ 4 were distributed in

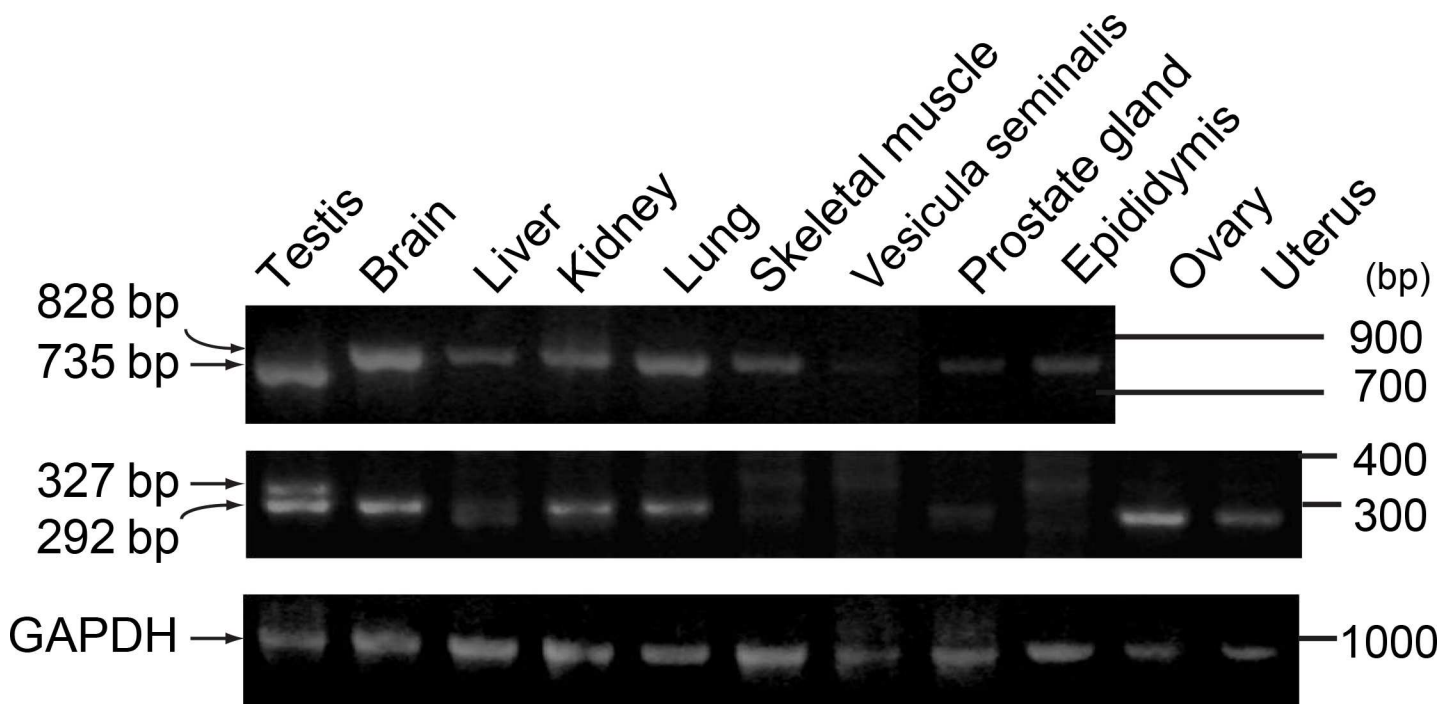

**Fig 4. The mRNA expression of DGK $\eta$ 3 and  $\eta$ 4 in mouse tissues.** RT-PCR analysis was carried out on panels of cDNA from mouse normal tissues. Upper panel shows 828-bp and 735-bp cDNA fragments amplified using primers A and B. Center panel shows 292-bp and 327-bp cDNA fragments amplified using primers C and D. Lower panel exhibits a 978-bp cDNA fragment amplified for mouse glyceraldehyde phosphate dehydrogenase (GAPDH). Representatives of three independent experiments are shown.

doi:10.1371/journal.pone.0162997.g004



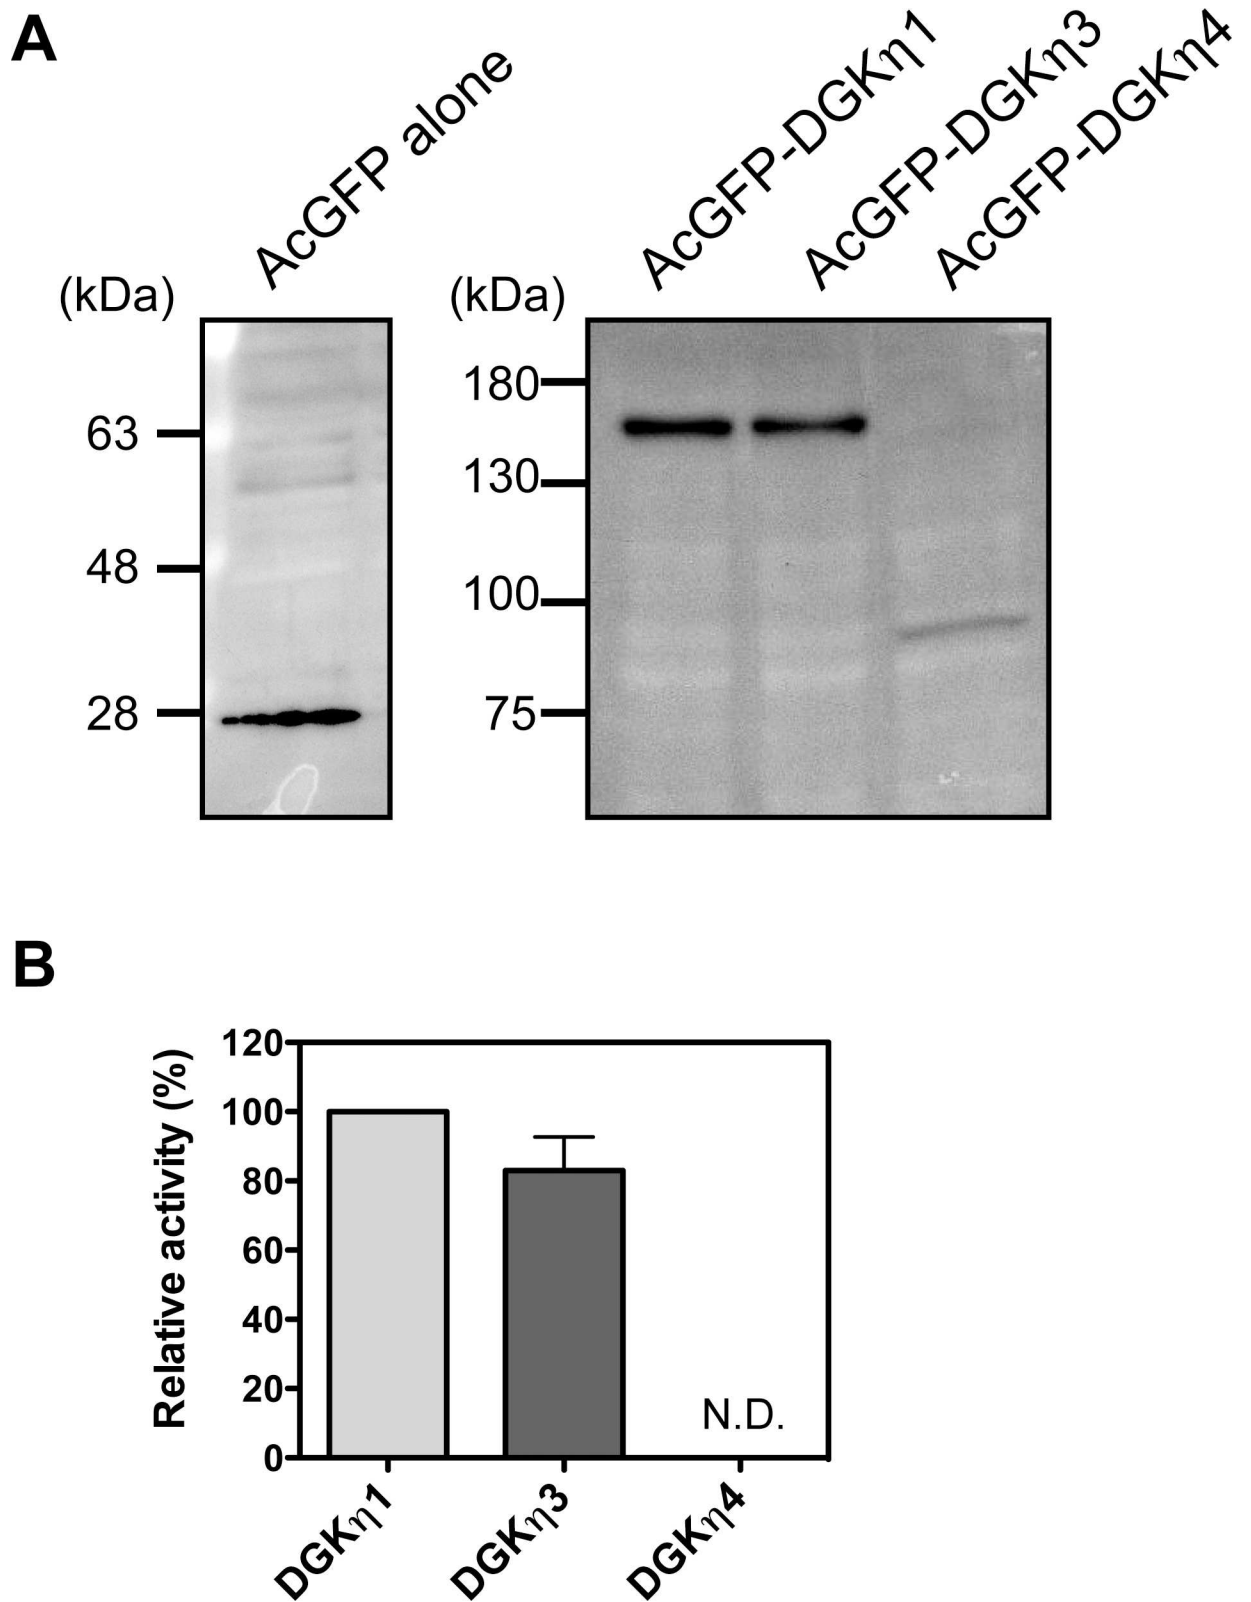

**Fig 5. Catalytic activities of DGK $\eta$ 3 and  $\eta$ 4.** (A) Expression of AcGFP alone, AcGFP-DGK $\eta$ 1,  $\eta$ 3 and  $\eta$ 4 in COS-7 cells. COS-7 cells were transfected with pAcGFP vector alone, pAcGFP-DGK $\eta$ 1,  $\eta$ 3 or  $\eta$ 4. The cell lysates (12  $\mu$ g of protein) were analyzed by Western blotting using anti-GFP antibody. (B) The relative activities of DGK $\eta$ 3 and  $\eta$ 4 compared to DGK $\eta$ 1. The cell lysates (5  $\mu$ g of

protein/sample) were assayed for DGK activity (triplicate determinations). The background activities were subtracted and then the values were normalized for DGK expression levels visualized by Western blotting. The results are presented as the percentage of the value of DGK $\eta$ 1 and the mean  $\pm$  S.D. of the values obtained in three separate experiments.

doi:10.1371/journal.pone.0162997.g005

punctate vesicles in the cytoplasm (Fig 6B). Unexpectedly, DGK $\eta$ 3 was partly translocated to the plasma membrane and co-localized with actin cytoskeleton in an osmotic stress-dependent manner (Fig 6B). As shown in Fig 6C, DGK $\eta$ 3 was translocated to the plasma membrane in approximately 45% of the cells in response to osmotic stress, whereas DGK $\eta$ 1 and  $\eta$ 4 were located at the plasma membrane in only 10–15% of the cells. These results strongly suggest that DGK $\eta$ 3 was specifically translocated to the plasma membrane in NEC8 cells in response to osmotic stress.

## Discussion

In this study, we cloned cDNA of the testis specific full length DGK $\eta$ 3 mRNA (Figs 1 and 2). Moreover, we found a new testis-specific alternative splicing product of the DGK $\eta$  gene, DGK $\eta$ 4, during the cloning procedure (Figs 1 and 3). DGK $\eta$ 4 lacks half of the catalytic domain (Fig 1).

The DGK $\eta$ 3 mRNA is a splice variant derived from the DGK $\eta$ 1 mRNA but not from the DGK $\eta$ 2 mRNA (Figs 1 and 2). Therefore, DGK $\eta$ 3 does not contain the SAM domain (Fig 1). DGK $\eta$ 4 also lacks the SAM domain (Fig 1). In addition to DGK $\delta$ 1 and  $\delta$ 2 [11, 14], DGK $\eta$ 2 formed an oligomer through its SAM domain [12]. However, it is unlikely that DGK $\eta$ 3 and  $\eta$ 4 are able to form oligomers.

The biochemical and cell biological properties of DGK $\eta$ 3 and  $\eta$ 4 were different from those of DGK $\eta$ 1. First, DGK activity was not detectable for DGK $\eta$ 4 (Fig 5). The loss of activity is reasonable because Rittiner *et al.* [26] revealed that a DGK $\eta$ 1 mutant lacking the C-terminal half of the catalytic domain did not show DGK activity. On the other hand, DGK $\eta$ 3 showed almost the same activity as DGK $\eta$ 1 (Fig 5), indicating that 31 amino acid-deletion between two coiled-coil structures (Fig 1) does not significantly affect its catalytic activity.

Second, the subcellular localization of DGK $\eta$ 3 was different from that of DGK $\eta$ 1 (Fig 6). Environmental stress causes testicular dysfunction [27, 28]. Thus, we tested whether DGK $\eta$ 3 and  $\eta$ 4 respond to osmotic stress stimulation. DGK $\eta$ 1 and  $\eta$ 2 were translocated to punctate vesicles in the cytoplasm in response to osmotic stress, as previously reported [12, 13, 26, 29]. In NEC8 cells DGK $\eta$ 1 or  $\eta$ 4 were also osmotic stress-dependently translocated to punctate vesicles in the cytoplasm (Fig 5). Interestingly, DGK $\eta$ 3, but not DGK $\eta$ 1 or  $\eta$ 4, was partly translocated to the plasma membrane and co-localized with F-actin in NEC8 cells in response to osmotic stress. Therefore, a 31 amino acid deletion between two coiled-coil structures in DGK $\eta$ 3 (Fig 1) would affect its osmotic stress-dependent localization. Thus, the length between two coiled-coil structures may be important for subcellular localization. The strong plasma membrane localization of DGK $\eta$ 3 was not observed in COS-7 cells (data not shown), suggesting that its translocation is cell line dependent.

It is possible that the splice variants DGK $\eta$ 3 and DGK $\eta$ 4 might be artifacts of cDNA preparation. However, this possibility is unlikely because the splice variants were detected only in the testis (Fig 4), although the artifacts would arise in every tissues. Moreover, we obtained the same RT-PCR products amplified from DGK $\eta$ 3 and DGK $\eta$ 4 mRNAs in three independent experiments. Furthermore, alternative splicing products of the DGK $\eta$  gene (accession number XP\_011243403, XP\_011243404 and XP\_006519232), which lack exon 26, are predicted and deposited into the NCBI database. These records are derived from a genomic sequence annotated using gene prediction method Gnomon, which is supported by mRNA and EST evidence.

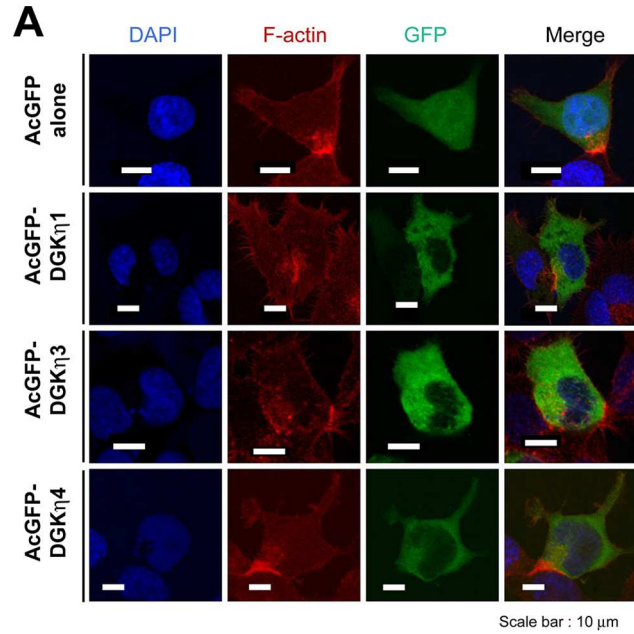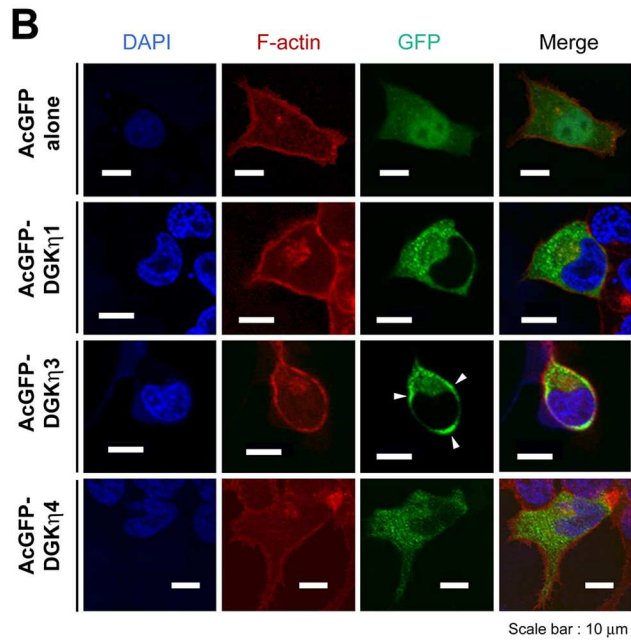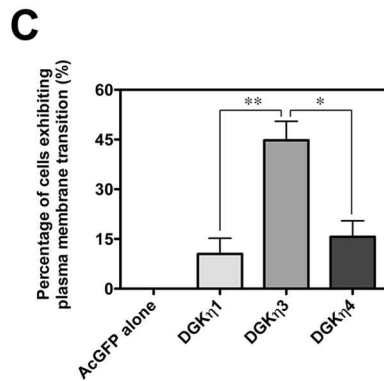

**Fig 6. Subcellular localization of DGK $\eta$ 3 and  $\eta$ 4 in NEC8 cells stimulated with osmotic stress.** NEC8 cells were transfected with pAcGFP vector alone, pAcGFP-DGK $\eta$ 1,  $\eta$ 3 or  $\eta$ 4. After 24 h, the cells were serum starved for 3 h and incubated (A) 0 mM or (B) 500 mM sorbitol in RPMI-1640 for 30 min. The cells were fixed with 3.7% formaldehyde and then mounted onto coverslips. The fixed cells were stained using Alexa 594-conjugated phalloidin and 4',6-diamino-2-phenyl indole (DAPI). Fluorescence images were obtained using an inverted confocal laser microscope. (C) The percentages of cells exhibiting translocation of AcGFP alone, AcGFP-DGK $\eta$ 1,  $\eta$ 3 or  $\eta$ 4 to the plasma membrane were scored. More than 20 cells expressing AcGFP alone, AcGFP-DGK $\eta$ 1,  $\eta$ 3 or  $\eta$ 4 were counted in each experiment. The results are the means  $\pm$  S.D. of three separate experiments. \* $P$ <0.05, \*\* $P$ <0.01.

doi:10.1371/journal.pone.0162997.g006

Finally, we robustly detected anti-DGK $\eta$  antibody-reactive bands of 126 kDa, which approximately corresponds to a calculated molecular mass of 124 kDa of DGK $\eta$ 3, and 118 kDa (Fig 2C). Moreover, we confirmed that the 126 and 118 kDa bands were disappeared in testes of DGK $\eta$ -knockout mice [24]. Because available anti-DGK $\eta$  antibodies detect the C-terminal half of DGK $\eta$ 1–3, we are not able to detect endogenous DGK $\eta$ 4 protein at present. Thus, it is also possible that the DGK $\eta$ 4 mRNA is a non-coding RNA. However, this possibility is unlikely because the splice variant contains initiation methionine and stop codons. Even if the DGK $\eta$ 4 mRNA is a non-coding RNA, it is predicted to play specialized roles in the testis.

DGK $\eta$ 3 and  $\eta$ 4 are expressed in the testis (Fig 4), especially in the secondary spermatocytes and round spermatids [25]. The round spermatids are generated from the secondary spermatocytes through the second meiotic division [30, 31], implying that these isoforms play specialized roles in meiosis during spermatogenesis. DGK $\eta$ 3 is catalytically active and stress-dependently localizes at the plasma membrane but not the cytoplasm where DGK $\eta$ 1 exists. DGK $\eta$ 4 exhibited the same localization with DGK $\eta$ 1 but is catalytically inactive. DGK $\eta$ 1 is known to enhance proliferation [18]. Thus, these isoforms may attenuate mitosis/proliferation and promote meiosis through their inactivity and different localization. Therefore, our present work would provide useful information to the study of spermatogenesis. However, to explore their specialized physiological functions, further study is required.

## Author Contributions

**Funding acquisition:** FS.

**Investigation:** EM TS SK YS.

**Project administration:** FS.

**Supervision:** FS.

**Writing – original draft:** EM FS.

**Writing – review & editing:** FS.

## References

1. Goto K, Hozumi Y, Kondo H. Diacylglycerol, phosphatidic acid, and the converting enzyme, diacylglycerol kinase, in the nucleus. *Biochim Biophys Acta*. 2006; 1761(5–6):535–41. Epub 2006/05/30. doi: [10.1016/j.bbali.2006.04.001](https://doi.org/10.1016/j.bbali.2006.04.001) PMID: [16731035](https://pubmed.ncbi.nlm.nih.gov/16731035/).
2. Merida I, Avila-Flores A, Merino E. Diacylglycerol kinases: at the hub of cell signalling. *Biochem J*. 2008; 409(1):1–18. Epub 2007/12/08. BJJ20071040 [pii] doi: [10.1042/BJ20071040](https://doi.org/10.1042/BJ20071040) PMID: [18062770](https://pubmed.ncbi.nlm.nih.gov/18062770/).
3. Sakane F, Imai S, Kai M, Yasuda S, Kanoh H. Diacylglycerol kinases: why so many of them? *Biochim Biophys Acta*. 2007; 1771(7):793–806. PMID: [17512245](https://pubmed.ncbi.nlm.nih.gov/17512245/).
4. Sakane F, Imai S, Kai M, Yasuda S, Kanoh H. Diacylglycerol kinases as emerging potential drug targets for a variety of diseases. *Curr Drug Targets*. 2008; 9(8):626–40. Epub 2008/08/12. PMID: [18691010](https://pubmed.ncbi.nlm.nih.gov/18691010/).

5. Topham MK. Signaling roles of diacylglycerol kinases. *J Cell Biochem.* 2006; 97(3):474–84. PMID: [16288460](#).
6. van Blitterswijk WJ, Houssa B. Properties and functions of diacylglycerol kinases. *Cell Signal.* 2000; 12(9–10):595–605. PMID: [11080611](#)
7. Sakai H, Sakane F. Recent progress on type II diacylglycerol kinases: the physiological functions of diacylglycerol kinase  $\delta$ ,  $\eta$  and  $\kappa$  and their involvement in disease. *J Biochem.* 2012; 152(5):397–406. doi: [10.1093/jb/mvs104](#) PMID: [22984004](#)
8. Sakane F, Imai S, Kai M, Wada I, Kanoh H. Molecular cloning of a novel diacylglycerol kinase isozyme with a pleckstrin homology domain and a C-terminal tail similar to those of the EPH family of protein tyrosine kinase. *J Biol Chem.* 1996; 271(14):8394–401. PMID: [8626538](#)
9. Klauck TM, Xu X, Mousseau B, Jaken S. Cloning and characterization of a glucocorticoid-induced diacylglycerol kinase. *J Biol Chem.* 1996; 271(33):19781–8. PMID: [8702685](#)
10. Imai S, Kai M, Yasuda S, Kanoh H, Sakane F. Identification and characterization of a novel human type II diacylglycerol kinase, DGK $\kappa$ . *J Biol Chem.* 2005; 280(48):39870–81. PMID: [16210324](#).
11. Sakane F, Imai S, Yamada K, Murakami T, Tsuchida S, Kanoh H. Alternative splicing of the human diacylglycerol kinase  $\delta$  gene generates two isoforms differing in their expression patterns and in regulatory functions. *J Biol Chem.* 2002; 277(45):43519–26. PMID: [12200442](#)
12. Murakami T, Sakane F, Imai S, Houkin K, Kanoh H. Identification and characterization of two splice variants of human diacylglycerol kinase  $\eta$ . *J Biol Chem.* 2003; 278(36):34364–72. PMID: [12810723](#).
13. Kume A, Kawase K, Komenoi S, Usuki T, Takeshita E, Sakai H, et al. The Pleckstrin Homology Domain of Diacylglycerol Kinase  $\eta$  Strongly and Selectively Binds to Phosphatidylinositol 4,5-Bisphosphate. *J Biol Chem.* 2016; 291(15):8150–61. Epub 2016/02/19. doi: [10.1074/jbc.M115.648717](#) PMID: [26887948](#).
14. Harada BT, Knight MJ, Imai S, Qiao F, Ramachander R, Sawaya MR, et al. Regulation of enzyme localization by polymerization: polymer formation by the SAM domain of diacylglycerol kinase  $\delta$ 1. *Structure.* 2008; 16(3):380–7. Epub 2008/03/13. S0969-2126(08)00023-3 [pii] doi: [10.1016/j.str.2007.12.017](#) PMID: [18334213](#).
15. Imai S, Sakane F, Kanoh H. Phorbol ester-regulated oligomerization of diacylglycerol kinase  $\delta$  linked to its phosphorylation and translocation. *J Biol Chem.* 2002; 277(38):35323–32. PMID: [12084710](#)
16. Knight MJ, Joubert MK, Plotkowski ML, Kropat J, Gingery M, Sakane F, et al. Zinc Binding Drives Sheet Formation by the SAM Domain of Diacylglycerol Kinase  $\delta$ . *Biochemistry.* 2010; 49(44):9667–76. Epub 2010/09/23. doi: [10.1021/bi101261x](#) PMID: [20857926](#).
17. Komenoi S, Takemura F, Sakai H, Sakane F. Diacylglycerol kinase  $\eta$ 1 is a high affinity isozyme for diacylglycerol. *FEBS Lett.* 2015; 589(11):1272–7. Epub 2015/04/12. doi: [10.1016/j.febslet.2015.03.032](#) PMID: [25862496](#).
18. Yasuda S, Kai M, Imai S, Takeishi K, Taketomi A, Toyota M, et al. Diacylglycerol kinase  $\eta$  augments C-Raf activity and B-Raf/C-Raf heterodimerization. *J Biol Chem.* 2009; 284(43):29559–70. Epub 2009/08/28. M109.043604 [pii] doi: [10.1074/jbc.M109.043604](#) PMID: [19710016](#); PubMed Central PMCID: PMC2785589.
19. Nakano T, Iravani A, Kim M, Hozumi Y, Lohse M, Reichert E, et al. Diacylglycerol kinase  $\eta$  modulates oncogenic properties of lung cancer cells. *Clinical & translational oncology: official publication of the Federation of Spanish Oncology Societies and of the National Cancer Institute of Mexico.* 2014; 16(1):29–35. Epub 2013/04/11. doi: [10.1007/s12094-013-1036-y](#) PMID: [23572183](#); PubMed Central PMCID: PMC3883989.
20. Usuki T, Sakai H, Shionoya T, Sato N, Sakane F. Expression and localization of type II diacylglycerol kinase isozymes  $\delta$  and  $\eta$  in the developing mouse brain. *The journal of histochemistry and cytochemistry: official journal of the Histochemistry Society.* 2015; 63(1):57–68. Epub 2014/11/02. doi: [10.1369/0022155414559130](#) PMID: [25362140](#).
21. Baum AE, Akula N, Cabanero M, Cardona I, Corona W, Klemens B, et al. A genome-wide association study implicates diacylglycerol kinase  $\eta$  (DGKH) and several other genes in the etiology of bipolar disorder. *Mol Psychiatry.* 2008; 13(2):197–207. Epub 2007/05/09. doi: [10.1038/sj.mp.4002012](#) PMID: [17486107](#); PubMed Central PMCID: PMC2527618.
22. Weber H, Kittel-Schneider S, Gessner A, Domschke K, Neuner M, Jacob CP, et al. Cross-disorder analysis of bipolar risk genes: further evidence of DGKH as a risk gene for bipolar disorder, but also unipolar depression and adult ADHD. *Neuropsychopharmacology: official publication of the American College of Neuropsychopharmacology.* 2011; 36(10):2076–85. doi: [10.1038/npp.2011.98](#) PMID: [21654738](#); PubMed Central PMCID: PMC3158324.
23. Zeng Z, Wang T, Li T, Li Y, Chen P, Zhao Q, et al. Common SNPs and haplotypes in DGKH are associated with bipolar disorder and schizophrenia in the Chinese Han population. *Mol Psychiatry.* 2011; 16(5):473–5. Epub 2010/08/25. doi: [10.1038/mp.2010.86](#) PMID: [20733578](#).

24. Isozaki T, Komenoi S, Lu Q, Usuki T, Tomokata S, Matsutomo D, et al. Deficiency of diacylglycerol kinase eta induces lithium-sensitive mania-like behavior. *J Neurochem*. 2016; 138(3):448–56. Epub 2016/05/12. doi: [10.1111/jnc.13661](https://doi.org/10.1111/jnc.13661) PMID: [27167678](https://pubmed.ncbi.nlm.nih.gov/27167678/).
25. Shionoya T, Usuki T, Komenoi S, Isozaki T, Sakai H, Sakane F. Distinct Expression and Localization of the Type II Diacylglycerol Kinase Isozymes  $\delta$ ,  $\eta$  and  $\kappa$  in the Mouse Reproductive Organs. *BMC Dev Biol*. 2015; 15(1):6.
26. Rittiner JE, Brings VE, Zylka MJ. Overexpression of diacylglycerol kinase eta enhances Galphaq-coupled G protein-coupled receptor signaling. *Mol Pharmacol*. 2014; 85(5):800–10. Epub 2014/03/13. doi: [10.1124/mol.113.091280](https://doi.org/10.1124/mol.113.091280) PMID: [24608858](https://pubmed.ncbi.nlm.nih.gov/24608858/); PubMed Central PMCID: [PMCPMC3990018](https://pubmed.ncbi.nlm.nih.gov/PMC3990018/).
27. Agarwal A, Desai NR, Ruffoli R, Carpi A. Lifestyle and testicular dysfunction: a brief update. *Biomedicine & pharmacotherapy = Biomedecine & pharmacotherapie*. 2008; 62(8):550–3. Epub 2008/09/06. doi: [10.1016/j.biopha.2008.07.052](https://doi.org/10.1016/j.biopha.2008.07.052) PMID: [18771892](https://pubmed.ncbi.nlm.nih.gov/18771892/).
28. Sharpe RM. Lifestyle and environmental contribution to male infertility. *British medical bulletin*. 2000; 56(3):630–42. Epub 2001/03/20. PMID: [11255550](https://pubmed.ncbi.nlm.nih.gov/11255550/).
29. Matsutomo D, Isozaki T, Sakai H, Sakane F. Osmotic shock-dependent redistribution of diacylglycerol kinase  $\eta$ 1 to non-ionic detergent-resistant membrane via pleckstrin homology and C1 domains. *J Biochem*. 2013; 153(2):179–90. doi: [10.1093/jb/mvs130](https://doi.org/10.1093/jb/mvs130) PMID: [23127959](https://pubmed.ncbi.nlm.nih.gov/23127959/)
30. Cheng YH, Wong EW, Cheng CY. Cancer/testis (CT) antigens, carcinogenesis and spermatogenesis. *Spermatogenesis*. 2011; 1(3):209–20. doi: [10.4161/spmg.1.3.17990](https://doi.org/10.4161/spmg.1.3.17990) PMID: [22319669](https://pubmed.ncbi.nlm.nih.gov/22319669/); PubMed Central PMCID: [PMC3271663](https://pubmed.ncbi.nlm.nih.gov/PMC3271663/).
31. Cooke HJ, Saunders PT. Mouse models of male infertility. *Nature reviews Genetics*. 2002; 3(10):790–801. doi: [10.1038/nrg911](https://doi.org/10.1038/nrg911) PMID: [12360237](https://pubmed.ncbi.nlm.nih.gov/12360237/).
